# Supplementary material for: Association between hospital volume, processes of care and outcomes after acute ischaemic stroke: a prospective observational study
Source: HighWire-hosted journal article supplement (doi:10.1136/bmjopen-2021-060015), 2022-06-01
Supplement: bmjopen-2021-060015supp001_data_supplement.pdf [file bmjopen-2021-060015supp001_data_supplement.pdf]

## ***Supplementary Material***

Table 1. The definition of process measures

|                                              | Definition*                                                                                                                                                                                                                                 |
|----------------------------------------------|---------------------------------------------------------------------------------------------------------------------------------------------------------------------------------------------------------------------------------------------|
| <b>Acute phase process measures</b>          |                                                                                                                                                                                                                                             |
| rt-PA                                        | intravenous tissue-type plasminogen activator (tPA) in patients who arrive within 2 hours after symptom onset and treated within 3 hours.                                                                                                   |
| Early antithrombotics                        | Antithrombotic treatment within 2 days after admission, including antiplatelet or anticoagulant medications.                                                                                                                                |
| DVT prophylaxis                              | Patients who cannot walk received DVT prophylaxis within 2 days after admission, including pneumatic compression, heparin sodium, warfarin sodium or new oral anticoagulants.                                                               |
| Dysphagia screening                          | Dysphagia screening before oral intake                                                                                                                                                                                                      |
| <b>Process measures at discharge</b>         |                                                                                                                                                                                                                                             |
| Antithrombotic medication                    | Antithrombotic medication prescribed at discharge.                                                                                                                                                                                          |
| Antihypertensive medication for hypertension | Antihypertensive medication prescribed at discharge for patients with hypertension.                                                                                                                                                         |
| Hypoglycemic medication for diabetes         | Hypoglycemic medication prescribed at discharge for patients with diabetes.                                                                                                                                                                 |
| Anticoagulation for AF                       | Anticoagulation medication prescribed at discharge for patients with atrial fibrillation.                                                                                                                                                   |
| Lowering LDL-C medication                    | Statin prescribed at discharge if LDL-C $\geq 100$ mg/dL or patient treated with lipid-lowering agent prior to admission, or LDL-C not documented.                                                                                          |
| Smoking cessation                            | Smoking cessation intervention before discharge for current smokers.                                                                                                                                                                        |
| Stroke education                             | Stroke education provided to patient and/or caregiver, including all five components: modifiable risk factors, stroke warning sign and symptoms, how to activate emergency medical services, need for follow-up and medications prescribed. |

rt-PA indicates recombinant tissue plasminogen activator; AF, atrial fibrillation; LDL-C, low-density lipoprotein cholesterol.

\*Performance and quality measures are applied only to eligible patients in the absence of documented contraindications or any other rationale as to why therapy was not provided.

Table 2. Baseline characteristics between included and excluded patients

| Characteristic                 | Included<br>(n=17550) | Excluded<br>(n=2054) | P       |
|--------------------------------|-----------------------|----------------------|---------|
| <b>Patient characteristics</b> |                       |                      |         |
| Male                           | 11163 (63.6%)         | 1274 (62.0%)         | 0.1591  |
| Age                            | 65(57-74)             | 65(57-75)            | 0.1122  |
| Health insurance               |                       |                      |         |
| URBMI                          | 8959 (51.0%)          | 1062 (51.7%)         | 0.4888  |
| NRCMS                          | 6932 (39.5%)          | 815 (39.7%)          |         |
| Commercial insurance           | 60 (0.3%)             | 9 (0.4%)             |         |
| Self-payment                   | 1599 (9.1%)           | 168 (8.2%)           |         |
| Education                      |                       |                      |         |
| Elementary or below            | 7934 (45.2%)          | 948 (46.2%)          | 0.3827  |
| Middle school                  | 4109 (23.4%)          | 453 (22.1%)          |         |
| High School or above           | 5507 (31.4%)          | 653 (31.8%)          |         |
| Previous or current smoking    | 7818 (44.5%)          | 854 (41.6%)          | 0.0104  |
| Drinking                       | 5277 (30.1%)          | 582 (28.3%)          | 0.1044  |
| Medical history                |                       |                      |         |
| Hypertension                   | 11386 (64.9%)         | 1311 (63.8%)         | 0.3455  |
| Diabetes                       | 3630 (20.7%)          | 430 (20.9%)          | 0.7905  |
| Hyperlipidemia                 | 2128 (12.1%)          | 242 (11.8%)          | 0.6514  |
| Atrial fibrillation            | 1185 (6.8%)           | 197 (9.6%)           | <0.0001 |
| Stroke or TIA                  | 5918 (33.7%)          | 722 (35.2%)          | 0.1951  |
| Medication history             |                       |                      |         |
| Antiplatelet                   | 3444 (19.6%)          | 425 (20.7%)          | 0.2501  |
| Anticoagulation                | 178 (1.0%)            | 30 (1.5%)            | 0.0618  |
| Antihypertension               | 7868 (44.8%)          | 907 (44.2%)          | 0.5610  |
| Lipid-lowering medicine        | 1207 (6.9%)           | 144 (7.0%)           | 0.8216  |
| Antidiabetics                  | 2782 (15.9%)          | 333 (16.2%)          | 0.6725  |
| NIHSS at admission             | 4(2-7)                | 4(1-8)               | 0.6146  |
| Days of hospitalization        | 13(9-16)              | 13(9-15)             | 0.3805  |

URBMI, urban resident basic medical insurance; NRCMS, new rural cooperative medical scheme.

Table 3. The association between hospital volume and performance measures from unadjusted models.

| Performance measures                         | Q1 VS Q4               |        | Q2 VS Q4               |        | Q3 VS Q4               |        |
|----------------------------------------------|------------------------|--------|------------------------|--------|------------------------|--------|
|                                              | Unadjusted OR (95% CI) | P      | Unadjusted OR (95% CI) | P      | Unadjusted OR (95% CI) | P      |
| rt-PA                                        | 0.64 (0.31, 1.34)      | 0.2386 | 0.72 (0.35, 1.49)      | 0.3811 | 0.62 (0.28, 1.37)      | 0.2389 |
| Early antithrombotic                         | 0.86 (0.39, 1.90)      | 0.7114 | 1.10 (0.49, 2.47)      | 0.8241 | 1.02 (0.44, 2.36)      | 0.9626 |
| Dysphagia screening                          | 0.78 (0.38, 1.60)      | 0.5015 | 2.03 (0.93, 4.42)      | 0.0754 | 1.08 (0.53, 2.18)      | 0.8327 |
| DVT prophylaxis                              | 1.31 (0.76, 2.28)      | 0.3329 | 1.37 (0.80, 2.36)      | 0.2501 | 2.22 (1.26, 3.91)      | 0.0059 |
| Antithrombotic medication                    | 1.43 (0.93, 2.20)      | 0.1077 | 1.74 (1.09, 2.76)      | 0.0196 | 1.40 (0.71, 2.75)      | 0.3307 |
| Lowering LDL-C medication                    | 1.12 (0.76, 1.66)      | 0.5726 | 1.35 (0.94, 1.94)      | 0.101  | 1.60 (1.10, 2.33)      | 0.0134 |
| Antihypertensive medication for hypertension | 0.91 (0.66, 1.25)      | 0.5588 | 0.84 (0.62, 1.14)      | 0.2679 | 1.08 (0.79, 1.49)      | 0.6339 |
| Hypoglycemic medication for diabetes         | 0.98 (0.67, 1.45)      | 0.931  | 1.00 (0.68, 1.46)      | 0.9978 | 1.06 (0.72, 1.58)      | 0.757  |
| Anticoagulation for AF                       | 0.58 (0.34, 1.01)      | 0.0528 | 0.77 (0.48, 1.24)      | 0.2842 | 1.24 (0.73, 2.09)      | 0.4229 |
| Smoking cessation                            | 0.72 (0.44, 1.18)      | 0.1959 | 0.83 (0.50, 1.37)      | 0.4646 | 0.81 (0.43, 1.53)      | 0.5187 |
| Defect-free measure of care                  | 0.88 (0.62, 1.25)      | 0.4634 | 1.13 (0.82, 1.56)      | 0.4496 | 1.15 (0.81, 1.62)      | 0.4347 |

rt-PA indicates recombinant tissue plasminogen activator; DVT, deep vein thrombosis; AF, atrial fibrillation; LDL-C, low-density lipoprotein cholesterol.
